# Supplementary material for: PVR and ICAM-1 on Blast Crisis CML Stem and Progenitor Cells with TKI Resistance Confer Susceptibility to NK Cells
Source: MDPI journal article supplement (doi:10.3390/cancers12071923), 2020-07-16
Supplement: s1 [file s1]

# Supplementary Materials: PVR and ICAM-1 on Blast Crisis CML Stem and Progenitor Cells with TKI Resistance Confer Susceptibility to NK Cells

Nayoung Kim, Mi-Yeon Kim, Young-Uk Cho, WenYong Chen, Kyoo-Hyung Lee and Hun Sik Kim

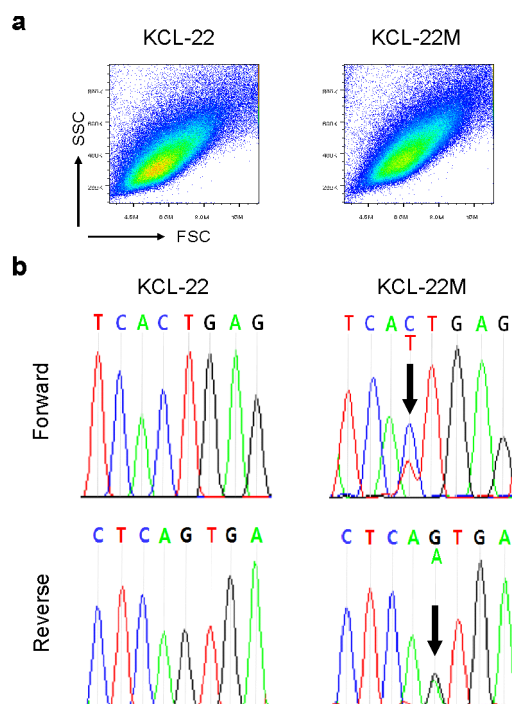

**Figure S1.** Molecular characterization of BCR-ABL1 T315I mutation in KCL-22M cells. (a) Comparison of the size and complexity of KCL-22 and KCL-22M cells. KCL-22M cells exhibited an increase in forward scatter (FSC) and side scatter (SSC) parameters. (b) Sequencing analysis of the BCR-ABL1 kinase domain with genomic DNA from KCL-22 and KCL-22M cells. Note the point mutation (arrow) of C to T (forward) and G to A (reverse) that causes the T315I mutation in a mutant allele of KCL-22M cells.

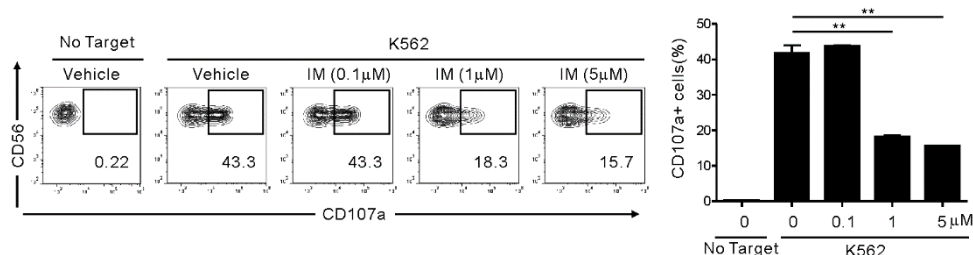

**Figure S2.** Reduced susceptibility of K562 cells harboring a wild-type BCR-ABL1 to NK cells after IM treatment. K562 cells were pretreated with the indicated doses of IM for 48 h, washed, and then incubated with expanded primary NK cells for 2 h. Shown are representative flow cytometry profile (left) and graph of statistical bar charts (right) demonstrating the percentage of CD107a+ NK cells. The mean values  $\pm$  s.d. of three independent experiments are shown. \*\*  $p < 0.01$  by Student  $t$ -test.

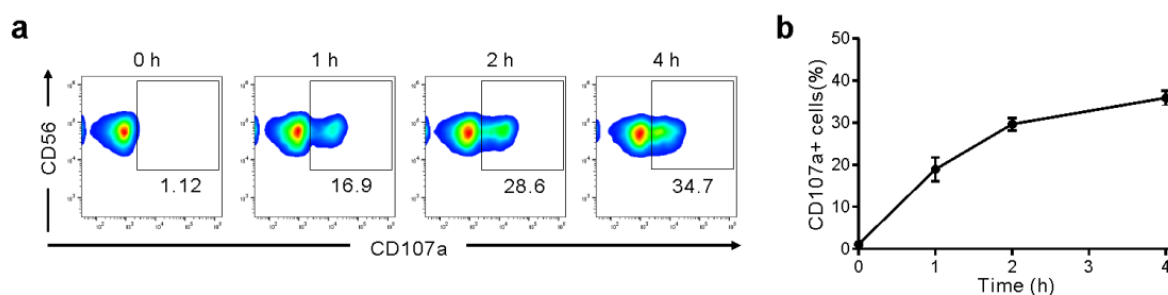

**Figure S3.** Association of primary CML-BC cell cytolysis with NK cell cytolytic activity. Degranulation assay against primary CML-BC cells with expanded primary NK cells for the indicated times. Shown are representative flow cytometry profile (**a**) and line graph (**b**) showing the cytotoxic degranulation (%) of CD107a+ NK cells. The mean values  $\pm$  s.d. of three independent experiments are shown.

#### CML-BC with most CD34+CD38+ population

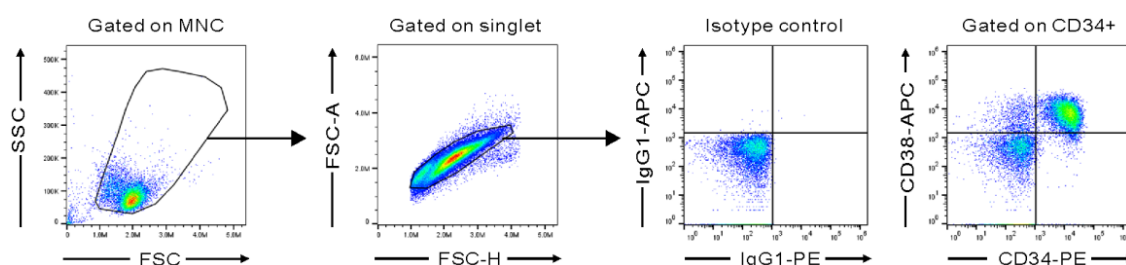

#### CML-BC with both CD34+CD38+ and CD34+CD38- population

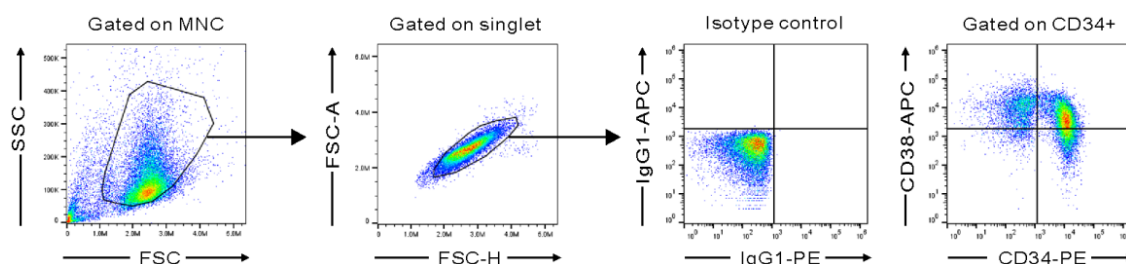

**Figure S4.** FACS gating strategy. Profiles showing the gating strategy for identifying the CD34<sup>+</sup> primary CML-BC cells including CD34<sup>+</sup>CD38<sup>-</sup> subset within the mononuclear cell (MNC) gate. Gating strategy: forward scatter (FSC) vs. side scatter (SSC) (left panel), then FSC-Height vs. FSC-Area (middle panel), and isotype control or CD34 vs. CD38 (right panel).

Table S1 Characteristics of study patients.

| No. | Source | BCR-ABL1 Mutation | Blast Type  | TKI-Resistance | CD34/CD38                                                                | Karyotype                                                                                                       |
|-----|--------|-------------------|-------------|----------------|--------------------------------------------------------------------------|-----------------------------------------------------------------------------------------------------------------|
| 1   | BM     | F317L/<br>E275K   | Myeloblast  | IM, DAS        | Little or no<br>CD34 <sup>+</sup> CD38 <sup>-</sup>                      | 46,XY,t(9;22)(q34;q11.2)[13]/46,XY[7]                                                                           |
| 2   | PB     | T315I             | Myeloblast  | IM, DAS        | Little or no<br>CD34 <sup>+</sup> CD38 <sup>-</sup>                      | 46,XX,t(9;22)(q34;q11.2)[8]/46,ide,del(9)(p22)[10]/46,XX[2]                                                     |
| 3   | PB     | E255V             | Lymphoblast | IM, NIL        | CD34 <sup>+</sup> CD38 <sup>+</sup> /CD34 <sup>+</sup> CD38 <sup>-</sup> | 46,XY,t(9;22)(q34;q11.2)[26]/46,ide,del(3)(q26.2q27),?del(1)(q23q23)[8]/46,XY[6]                                |
| 4   | PB     | E255V             | Myeloblast  | DAS, NIL       | CD34 <sup>+</sup> CD38 <sup>+</sup> /CD34 <sup>+</sup> CD38 <sup>-</sup> | 46,XY,inv(3)(q21q24),t(9;22)(q34;q11.2)[20]                                                                     |
| 5   | BM     | None              | Myeloblast  | IM             | Little or no<br>CD34 <sup>+</sup> CD38 <sup>-</sup>                      | 55,XX,+4,+8,t(9;22)(q34;q11.2),+10,+del(13)(q12q22),+19,+20,+21,+22,+der(22)t(9;22)[8]/56,ide,der(22)t(9;22)[2] |
| 6   | BM, PB | E255K             | Myeloblast  | NIL            | CD34 <sup>+</sup> CD38 <sup>+</sup> /CD34 <sup>+</sup> CD38 <sup>-</sup> | 46,XX,t(1;21)(p36.3;q22),t(9;22)(q34;q11.2)[1]/47,sl,-X,+8,+10[25]/48,sdl,+der(22)t(9;22)(q34;q11.2)[4]         |
| 7   | PB     | None              | Myeloblast  | NIL, DAS, PON  | CD34 <sup>+</sup> CD38 <sup>+</sup> /CD34 <sup>+</sup> CD38 <sup>-</sup> | Not available                                                                                                   |

Abbreviations: BM, bone marrow; PB, peripheral blood; TKI, tyrosine kinase inhibitor; IM, imatinib; DAS, dasatinib; NIL, nilotinib; PON, ponatinib.

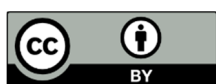

© 2020 by the authors. Licensee MDPI, Basel, Switzerland. This article is an open access article distributed under the terms and conditions of the Creative Commons Attribution (CC BY) license (<http://creativecommons.org/licenses/by/4.0/>).
